# Supplementary material for: Hybrids of RNA viruses and viroid-like elements replicate in fungi
Source: PubMed Central journal article supplement (PMC10162972; doi:10.1038/s41467-023-38301-2), 2023-05-05
Supplement: 41467_2023_38301_MOESM3_ESM.pdf [file 41467_2023_38301_MOESM3_ESM.pdf]

## **Description of Additional Supplementary Files:**

**Supplementary Data 1:** Oligonucleotides used in this study and their features
